# Supplementary material
Source: PubMed Central journal article supplement (PMC7992120)
Supplement: NIHMS1679586-supplement-Supplementary_Text_and_Figures.pdf [file NIHMS1679586-supplement-Supplementary_Text_and_Figures.pdf]

## 1. Supplementary Tables

**Supplementary Table 1: DAKD and its analogues used in this work with different isotope labeling schemes or chemical modifications.** Peptides for ssNMR experiments were uniformly  $^{13}\text{C}$ ,  $^{15}\text{N}$ -labelled on specific residue sites.

| Peptide           | Labeling scheme                                                                                  | Abbreviation                                                            |
|-------------------|--------------------------------------------------------------------------------------------------|-------------------------------------------------------------------------|
| DAKD              | $(^{13}\text{C}, ^{15}\text{N})\text{K-RPPGFSPF}^{(a)}$                                          | U- $[^{13}\text{C}, ^{15}\text{N}]$ -K <sub>1</sub> DAKD                |
|                   | K- $(^{13}\text{C}, ^{15}\text{N})\text{R-PPGF-}(^{13}\text{C}, ^{15}\text{N})\text{S-PF}^{(b)}$ | U- $[^{13}\text{C}, ^{15}\text{N}]$ -R <sub>2</sub> S <sub>7</sub> DAKD |
|                   | KR- $(^{13}\text{C}, ^{15}\text{N})\text{P-PGFSPF}^{(a)}$                                        | U- $[^{13}\text{C}, ^{15}\text{N}]$ -P <sub>3</sub> DAKD                |
|                   | KRP- $(^{13}\text{C}, ^{15}\text{N})\text{P-GFSPF}^{(a)}$                                        | U- $[^{13}\text{C}, ^{15}\text{N}]$ -P <sub>4</sub> DAKD                |
|                   | KRPP- $(^{13}\text{C}, ^{15}\text{N})\text{G-}(^{13}\text{C}, ^{15}\text{N})\text{F-SPF}^{(a)}$  | U- $[^{13}\text{C}, ^{15}\text{N}]$ -G <sub>5</sub> F <sub>6</sub> DAKD |
|                   | KRPPGFS- $(^{13}\text{C}, ^{15}\text{N})\text{P-}(^{13}\text{C}, ^{15}\text{N})\text{F}^{(b)}$   | U- $[^{13}\text{C}, ^{15}\text{N}]$ -S <sub>7</sub> P <sub>8</sub> DAKD |
| DALK              | KRPPGFS- $(^{13}\text{C}, ^{15}\text{N})\text{P-}(^{13}\text{C}, ^{15}\text{N})\text{L}^{(a)}$   | U- $[^{13}\text{C}, ^{15}\text{N}]$ -P <sub>8</sub> L <sub>9</sub> DALK |
| DAKD(N-Methyl F6) | KRPPG-(N-Methyl)F-SPF <sup>(a)</sup>                                                             | DAKD(N-Methyl F6)                                                       |

(a) Thermo Fisher Scientific, Ulm, Germany, (b) Eurogentec, Cologne, Germany

**Supplementary Table 2: Chemical Shift assignment of DAKD bound to B<sub>1</sub>R\***

| Residue | Atoms |       |            |           |            |            |              |           |                                      |
|---------|-------|-------|------------|-----------|------------|------------|--------------|-----------|--------------------------------------|
|         | N     | C'    | C $\alpha$ | C $\beta$ | C $\gamma$ | C $\delta$ | C $\epsilon$ | C $\zeta$ | N(sidechain)                         |
| K1      | 40.2  | 173.8 | 55.9       | 33.4      | -          | 29.5       | 41.8         |           | 32.5 (N $\zeta$ )                    |
| R2      | 121.5 | 174.8 | 55.0       | 30.8      | 27.5       | 43.3       |              | 158.7     | 83.5 (N $\epsilon$ ) 73.6(N $\eta$ ) |
| P3      | 133.9 | 175.7 | 61.7       | 31.2      | 28.5       | 50.6       |              |           |                                      |
| P4      | 131.7 | 177.4 | 63.5       | 32.5      | 28.4       | 50.4       |              |           |                                      |
| G5      | 111.9 | 174.7 | 45.2       |           |            |            |              |           |                                      |
| F6      | 118.7 | 178.5 | 59.0       | 40.1      | 129.1      | 131.7      | 131.7        | 134.1     |                                      |
| S7      | 121.8 | 174.4 | 55.4       | 62.6      |            |            |              |           |                                      |
| P8      | 135.1 | 175.9 | 62.7       | 32.7      | 28.5       | 50.6       |              |           |                                      |
| F9      | 124.4 | 181.0 | 57.3       | 39.4      | 128.5      | 131.6      | 131.6        | 133.8     |                                      |

\*  $^{13}\text{C}$  chemical shifts (in ppm) are referenced to TSP.

\*  $^{15}\text{N}$  chemical shifts (in ppm) are referenced to liquid  $\text{NH}_3$ .

**Supplementary Table 3: Chemical Shift assignment of DAKD without B<sub>1</sub>R\* (solid-state NMR)**

| Residue | Atoms |       |            |           |            |            |              |           |                                      |
|---------|-------|-------|------------|-----------|------------|------------|--------------|-----------|--------------------------------------|
|         | N     | C'    | C $\alpha$ | C $\beta$ | C $\gamma$ | C $\delta$ | C $\epsilon$ | C $\zeta$ | N(sidechain)                         |
| K1      | 40.7  | 173.4 | 55.5       | 33.6      | 22.5       | 29.4       | 42.2         |           | 33.4 (N $\zeta$ )                    |
| R2      | 121.1 | 175.1 | 55.0       | 30.3      | 26.8       | 43.2       |              | 158.8     | 83.2 (N $\epsilon$ ) 72.6(N $\eta$ ) |
| P3      | 133.2 | 174.8 | 61.8       | 31.1      | 27.9       | 50.8       |              |           |                                      |
| P4      | 130.7 | 178.3 | 63.3       | 32.7      | 28.3       | 50.6       |              |           |                                      |
| G5      | 111.3 | 174.7 | 45.1       |           |            |            |              |           |                                      |
| F6      | 118.5 | 178.6 | 58.7       | 40.0      | 129.3      | 132.2      | 132.2        | 134.7     |                                      |
| S7      | 121.1 | 174.0 | 56.1       | 62.7      |            |            |              |           |                                      |
| P8      | 135.8 | 176.0 | 62.6       | 32.8      | 28.5       | 51.0       |              |           |                                      |
| F9      | 126.5 | 181.6 | 58.6       | 39.8      | 129.1      | 130.8      | 132.3        | 132.9     |                                      |

\* <sup>13</sup>C chemical shifts (in ppm) are referenced to TSP.

\* <sup>15</sup>N chemical shifts (in ppm) are referenced to liquid NH<sub>3</sub>.

**Supplementary Table 4: Chemical Shift Differences of bound DAKD – free DAKD (solid-state NMR)**

| Residue | Atoms |      |            |           |            |            |              |           |                                     |
|---------|-------|------|------------|-----------|------------|------------|--------------|-----------|-------------------------------------|
|         | N     | C'   | C $\alpha$ | C $\beta$ | C $\gamma$ | C $\delta$ | C $\epsilon$ | C $\zeta$ | N(sidechain)                        |
| K1      | -0.5  | +0.4 | +0.4       | -0.2      |            | +0.1       | -0.4         |           | -0.9 (N $\zeta$ )                   |
| R2      | +0.4  | -0.3 | 0.0        | +0.5      | +0.7       | +0.1       |              | -0.1      | +0.3(N $\epsilon$ ) +1.0(N $\eta$ ) |
| P3      | +0.7  | +0.9 | -0.1       | +0.1      | +0.6       | -0.2       |              |           |                                     |
| P4      | +1.0  | -0.9 | +0.2       | -0.2      | +0.1       | -0.2       |              |           |                                     |
| G5      | +0.6  | 0.0  | +0.1       |           |            |            |              |           |                                     |
| F6      | +0.2  | -0.1 | +0.3       | +0.1      | -0.2       | -0.5       | -0.5         | -0.6      |                                     |
| S7      | +0.7  | +0.4 | -0.7       | -0.1      |            |            |              |           |                                     |
| P8      | -0.7  | -0.1 | +0.1       | -0.1      | 0.0        | -0.4       |              |           |                                     |
| F9      | -2.1  | -0.6 | -1.3       | -0.4      | -0.6       | +0.8       | -0.7         | +0.9      |                                     |

\* <sup>13</sup>C chemical shifts (in ppm) are referenced to TSP.

\* <sup>15</sup>N chemical shifts (in ppm) are referenced to liquid NH<sub>3</sub>.

**Supplementary Table 5: Chemical Shift assignment of DAKD without B<sub>1</sub>R\* in solution without detergent at 298K \***298K, H<sub>2</sub>O/D<sub>2</sub>O, 50mM MES, pH5.6, 100mM NaCl

| Residue | Atoms |      |       |            |           |            |            |              |            |           |            |            |              |
|---------|-------|------|-------|------------|-----------|------------|------------|--------------|------------|-----------|------------|------------|--------------|
|         | N     | NH   | C'    | C $\alpha$ | C $\beta$ | C $\gamma$ | C $\delta$ | C $\epsilon$ | H $\alpha$ | H $\beta$ | H $\gamma$ | H $\delta$ | H $\epsilon$ |
| K1      | -     | -    | 172.3 | 55.5       | 33.2      | 23.8       | 29.1       | 41.9         | 3.94       | 1.79      | 1.34       | 1.60       | 2.90         |
| R2      | 125.1 | 8.66 | 173.3 | 54.2       | 30.0      | 26.7       | 43.3       |              | 4.50       | 1.62      | 1.54       | 2.98       | 7.01         |
| P3      | -     |      | 174.4 | -          | 30.7      | 27.3       | 50.6       |              | -          | 1.79/2.28 | 1.92       | 2.74/3.39  |              |
| P4      | -     |      | 177.4 | 63.3       | 31.9      | 27.4       | 50.4       |              | 4.30       | 1.80/2.19 | 1.94       | 3.56/3.71  |              |
| G5      | 109.1 | 8.35 | 173.7 | 45.0       |           |            |            |              | 3.74/3.83  |           |            |            |              |
| F6      | 120.2 | 7.89 | 175.3 | 57.9       | 39.8      | -          | -          | -            | 4.45       | 2.94      | -          | 7.11       | 7.22         |
| S7      | 119.8 | 8.04 | 172.3 | 55.5       | 63.7      |            |            |              | 4.54       | 3.61      |            |            |              |
| P8      | -     |      | 175.3 | 63.4       | 31.7      | 26.7       | 50.6       |              | 4.20       | 1.71/2.04 | 1.60/1.80  | 3.46       |              |
| F9      | 123.5 | 7.33 | 180.0 | 58.7       | 40.2      | -          | -          | -            | 4.32       | 2.84/3.04 | -          | 7.13       | 7.24         |

\* <sup>13</sup>C chemical shifts (in ppm) are referenced to TSP.\* <sup>15</sup>N chemical shifts (in ppm) are referenced to liquid NH<sub>3</sub>.

**Supplementary Table 6: Solution NMR and refinement statistics for free DAKD in solution without detergents**

|                                              | ARIA             | CYANA<br>(TALOS+) | CYANA<br>(TALOS-N) | Forward<br>cluster A |
|----------------------------------------------|------------------|-------------------|--------------------|----------------------|
| <b>NMR distance and dihedral constraints</b> |                  |                   |                    |                      |
| Distance constraints                         |                  |                   |                    |                      |
| Total NOE                                    | 73               | -                 | -                  | -                    |
| Intra-residue                                | 48               | -                 | -                  | -                    |
| Inter-residue                                |                  |                   |                    |                      |
| Sequential ( $ i - j  = 1$ )                 | 24               | -                 | -                  | -                    |
| Medium-range ( $ i - j  < 4$ )               | 1                | -                 | -                  | -                    |
| Long-range ( $ i - j  > 5$ )                 | -                | -                 | -                  | -                    |
| Intermolecular                               | -                | -                 | -                  | -                    |
| Hydrogen bonds                               | 0                | -                 | -                  | -                    |
| Total dihedral angle restraints              | 14               | 11                | 11                 | 11                   |
| $\phi$                                       | 7                | 4                 | 4                  | 4                    |
| $\psi$                                       | 7                | 7                 | 7                  | 7                    |
| <b>Structure statistics</b>                  |                  |                   |                    |                      |
| Violations (mean and s.d.)                   |                  |                   |                    |                      |
| Distance constraints (Å)                     | 0.039 ± 0.002    | -                 | -                  | -                    |
| Dihedral angle constraints (°)               | 0.83 ± 0.19      | 2.64 ± 0.88       | 2.56 ± 0.87        | 0.20 ± 0.07          |
| Max. dihedral angle violation (°)            | 5.42             | 11.90             | 15.35              | 2.22                 |
| Max. distance constraint violation (Å)       | 0.312            | -                 | -                  | -                    |
| Number of CYANA restraints violations*       | -                | 3                 | 2                  | 0                    |
| CYANA target function ( $10^{-2}$ )          | -                | 1.59              | 1.88               | 0.75                 |
| Deviations from idealized geometry           |                  |                   |                    |                      |
| Bond lengths (Å)                             | 0.008            | 0.001             | 0.001              | 0.001                |
| Bond angles (°)                              | 0.6              | 0.3               | 0.3                | 0.3                  |
| Impropers (°)                                | 1.05             | 0.64              | 0.64               | 0.64                 |
| Average pairwise r.m.s. deviation** (Å)      |                  |                   |                    |                      |
| Heavy                                        | 2.80 ± 0.73 (20) | 1.63 ± 0.24 (10)  | 1.57 ± 0.23 (10)   | 1.68 ± 0.24 (10)     |
| Backbone                                     | 1.29 ± 0.47 (20) | 0.57 ± 0.13 (10)  | 0.53 ± 0.12 (10)   | 0.58 ± 0.13 (10)     |
| Ramachandran distribution                    |                  |                   |                    |                      |
| Most favored (%)                             | 98.3             | 100               | 100                | 100                  |
| Additional allowed (%)                       | 1.7              | 0                 | 0                  | 0                    |
| Generally allowed (%)                        | 0                | 0                 | 0                  | 0                    |
| Disallowed region (%)                        | 0                | 0                 | 0                  | 0                    |

\* Violations are counted if at least 3 out of 10 structural models show violation

\*\* The number of structural models for computing pairwise r.m.s. deviation was listed in ( ).

**Supplementary Table 7: ssNMR and refinement statistics for DAKD bound to B1R**

|                                              | CYANA<br>(TALOS+) | CYANA<br>(TALOS-N) | CYANA<br>(PREDITOR) | Forward<br>cluster A |
|----------------------------------------------|-------------------|--------------------|---------------------|----------------------|
| <b>NMR distance and dihedral constraints</b> |                   |                    |                     |                      |
| Distance constraints                         |                   |                    |                     |                      |
| Total NOE                                    | -                 | -                  | -                   | -                    |
| Intra-residue                                | -                 | -                  | -                   | -                    |
| Inter-residue                                |                   |                    |                     |                      |
| Sequential ( $ i - j  = 1$ )                 | -                 | -                  | -                   | -                    |
| Medium-range ( $ i - j  < 4$ )               | -                 | -                  | -                   | -                    |
| Long-range ( $ i - j  > 5$ )                 | -                 | -                  | -                   | -                    |
| Intermolecular                               | -                 | -                  | -                   | -                    |
| Hydrogen bonds                               | -                 | -                  | -                   | -                    |
| Total dihedral angle restraints              | 11                | 11                 | 10                  | 13                   |
| $\phi$                                       | 4                 | 4                  | 4                   | 5                    |
| $\psi$                                       | 7                 | 7                  | 6                   | 8                    |
| <b>Structure statistics</b>                  |                   |                    |                     |                      |
| Violations (mean and s.d.)                   |                   |                    |                     |                      |
| Distance constraints (Å)                     | -                 | -                  | -                   | -                    |
| Dihedral angle constraints (°)               | 0.43 ± 0.14       | 1.00 ± 0.43        | 0.87 ± 0.29         | 0.78 ± 0.26          |
| Max. dihedral angle violation (°)            | 4.78              | 10.85              | 8.72                | 5.48                 |
| Max. distance constraint violation (Å)       | -                 | -                  | -                   | -                    |
| Number of CYANA restraints violations*       | 0                 | 2                  | 2                   | 1                    |
| CYANA target function ( $10^{-3}$ )          | 7.61              | 14.7               | 7.11                | 8.53                 |
| Deviations from idealized geometry           |                   |                    |                     |                      |
| Bond lengths (Å)                             | 0.001             | 0.001              | 0.001               | 0.001                |
| Bond angles (°)                              | 0.3               | 0.3                | 0.3                 | 0.3                  |
| Impropers (°)                                | 0.64              | 0.64               | 0.64                | 0.64                 |
| Average pairwise r.m.s. deviation** (Å)      |                   |                    |                     |                      |
| Heavy                                        | 1.67 ± 0.18       | 1.46 ± 0.31        | 2.07 ± 0.31         | 1.49 ± 0.34          |
| Backbone                                     | 0.50 ± 0.09       | 0.36 ± 0.10        | 0.82 ± 0.23         | 0.39 ± 0.12          |
| Ramachandran distribution                    |                   |                    |                     |                      |
| Most favored (%)                             | 100               | 97                 | 60                  | 100                  |
| Additional allowed (%)                       | 0                 | 3                  | 40                  | 0                    |
| Generally allowed (%)                        | 0                 | 0                  | 0                   | 0                    |
| Disallowed region (%)                        | 0                 | 0                  | 0                   | 0                    |

\* Violations are counted if at least 3 out of 10 structural models show violation

\*\* Pairwise r.m.s. deviations were calculated on 10 structural models.

**Supplementary Table 8: SSNMR and TALOS+/CYANA refinement statistics for DAKD and BK in different states**

|                                              | DAKD<br>(+ B1R) | DAKD<br>(- B1R) | BK<br>(+ B2R) | BK<br>(- B2R) |
|----------------------------------------------|-----------------|-----------------|---------------|---------------|
| <b>NMR distance and dihedral constraints</b> |                 |                 |               |               |
| Distance constraints                         |                 |                 |               |               |
| Total NOE                                    | -               | -               | -             | -             |
| Intra-residue                                | -               | -               | -             | -             |
| Inter-residue                                |                 |                 |               |               |
| Sequential ( $ i - j  = 1$ )                 | -               | -               | -             | -             |
| Medium-range ( $ i - j  < 4$ )               | -               | -               | -             | -             |
| Long-range ( $ i - j  > 5$ )                 | -               | -               | -             | -             |
| Intermolecular                               | -               | -               | -             | -             |
| Hydrogen bonds                               | -               | -               | -             | -             |
| Total dihedral angle restraints              | 11              | 11              | 10            | 10            |
| $\phi$                                       | 4               | 4               | 4             | 4             |
| $\psi$                                       | 7               | 7               | 6             | 6             |
| <b>Structure statistics</b>                  |                 |                 |               |               |
| Violations (mean and s.d.)                   |                 |                 |               |               |
| Distance constraints (Å)                     | -               | -               | -             | -             |
| Dihedral angle constraints (°)               | 0.43 ± 0.14     | 1.99 ± 0.67     | 2.32 ± 0.77   | 0.64 ± 0.21   |
| Max. dihedral angle violation (°)            | 4.78            | 10.59           | 23.21         | 6.36          |
| Max. distance constraint violation (Å)       | -               | -               | -             | -             |
| Number of CYANA restraints violations*       | 0               | 2               | 1             | 1             |
| CYANA target function ( $10^{-3}$ )          | 7.61            | 13.8            | 21.1          | 5.07          |
| Deviations from idealized geometry           |                 |                 |               |               |
| Bond lengths (Å)                             | 0.001           | 0.001           | 0.001         | 0.001         |
| Bond angles (°)                              | 0.3             | 0.3             | 0.3           | 0.3           |
| Impropers (°)                                | 0.64            | 0.65            | 0.62          | 0.63          |
| Average pairwise r.m.s. deviation** (Å)      |                 |                 |               |               |
| Heavy                                        | 1.67 ± 0.18     | 1.73 ± 0.25     | 1.63 ± 0.22   | 2.29 ± 0.42   |
| Backbone                                     | 0.50 ± 0.09     | 0.43 ± 0.12     | 0.28 ± 0.07   | 0.58 ± 0.12   |
| Ramachandran distribution                    |                 |                 |               |               |
| Most favored (%)                             | 100             | 100             | 77            | 97            |
| Additional allowed (%)                       | 0               | 0               | 23            | 3             |
| Generally allowed (%)                        | 0               | 0               | 0             | 0             |
| Disallowed region (%)                        | 0               | 0               | 0             | 0             |

\* Violations are counted if at least 3 out of 10 structural models show violation

\*\* Pairwise r.m.s. deviations were calculated on 10 structural models.

**Supplementary Table 9: Summary of GPCR template X-ray structures used for B<sub>1</sub>R/B<sub>2</sub>R comparative modeling.**

| Template Name                          | Species | Sequence identity to B <sub>1</sub> R (%) | Sequence identity to B <sub>2</sub> R (%) | PDB code | Resolution (Å) | Reference |
|----------------------------------------|---------|-------------------------------------------|-------------------------------------------|----------|----------------|-----------|
| angiotensin II type 1 receptor         | human   | 33                                        | 34                                        | 4yay     | 2.9            | 1         |
| C-C chemokine receptor type 5          | human   | 28                                        | 24                                        | 4mbs     | 2.7            | 2         |
| κ-opioid receptor                      | human   | 24                                        | 27                                        | 4djh     | 2.9            | 3         |
| orexin receptor type 2                 | human   | 20                                        | 21                                        | 4s0v     | 2.5            | 4         |
| P <sub>2</sub> Y <sub>1</sub> receptor | human   | 22                                        | 25                                        | 4xnv     | 2.2            | 5         |
| δ-opioid receptor                      | human   | 26                                        | 26                                        | 4n6h     | 1.8            | 6         |
| μ-opioid receptor                      | human   | 24                                        | 26                                        | 4dkl     | 2.8            | 7         |
| lysophosphatidic acid receptor 1       | human   | 21                                        | 18                                        | 4z35     | 2.9            | 8         |
| nociceptin receptor                    | human   | 24                                        | 27                                        | 4ea3     | 3.0            | 9         |
| rhodopsin                              | bovine  | 21                                        | 23                                        | 2x72     | 3.0            | 10        |
| 5-hydroxytryptamine receptor 2B        | human   | 19                                        | 21                                        | 4ib4     | 2.7            | 11        |
| β <sub>1</sub> -adrenergic receptor    | turkey  | 19                                        | 19                                        | 2y03     | 2.9            | 12        |
| proteinase-activated receptor 1        | human   | 20                                        | 24                                        | 3vw7     | 2.2            | 13        |
| muscarinic acetylcholine receptor M2   | human   | 19                                        | 20                                        | 3uon     | 3.0            | 14        |
| histamine H1 receptor                  | human   | 22                                        | 21                                        | 3rze     | 3.1            | 15        |
| muscarinic acetylcholine receptor M3   | rat     | 18                                        | 21                                        | 4u15     | 2.8            | 16        |
| β <sub>2</sub> -adrenergic receptor    | human   | 19                                        | 20                                        | 3sn6     | 3.2            | 17        |
| β <sub>2</sub> -adrenergic receptor    | human   | 19                                        | 21                                        | 2rh1     | 2.4            | 18        |
| adenosine receptor A2a                 | human   | 21                                        | 22                                        | 3qak     | 2.7            | 19        |
| adenosine receptor A2a                 | human   | 21                                        | 22                                        | 3eml     | 2.6            | 20        |
| sphingosine 1-phosphate receptor 1     | human   | 21                                        | 21                                        | 3v2y     | 2.8            | 21        |
| dopamine D3 receptor                   | human   | 20                                        | 25                                        | 3pbl     | 2.9            | 22        |
| 5-hydroxytryptamine receptor 1B        | human   | 19                                        | 21                                        | 4iar     | 2.7            | 23        |
| free fatty acid receptor 1             | human   | 19                                        | 15                                        | 4phu     | 2.3            | 24        |







**Supplementary Table 11: Comparison of peptide N-terminal binding region of B<sub>1</sub>R from different mammals.** The conserved binding residues are highlighted in yellow. The positions at which where changes in charge occur are labeled in red. Residue and BW numbering are based on human B<sub>1</sub>R. All the non-rodent sequences as well as the common rat, mouse and Chinese hamster sequences were obtained from Uniprot. Sequences of other rodents were fished using Blast. The alignment were performed by Multalin server<sup>25</sup> using default parameters and the figure was prepared from the output of ESPript 3 (<http://nar.oxfordjournals.org/content/42/W1/W320.long>).

|            |                                                                              | 270                 | 280          | 290                      |
|------------|------------------------------------------------------------------------------|---------------------|--------------|--------------------------|
|            |                                                                              |                     |              |                          |
|            |                                                                              | <i>E6.58</i>        | <i>R6.62</i> | <i>E7.28 D7.29 D7.32</i> |
| Primates   | Homo sapiens (human)                                                         | HFFAFLEFLFQVQAVRGC  | FWEDFDL      | DLGLQLA                  |
|            | Pan troglodytes (chimpanzee)                                                 | HFFAFLEFLFQVQAVRGC  | FWEDFDL      | DLGLQLA                  |
|            | Chlorocebus aethiops (African green monkey)                                  | HFFAFLEFLFQVQAIRGCF | WEDFDL       | DLGLQLA                  |
|            | Papio anubis (olive baboon)                                                  | HFFAFLEFLFQVQAVRGC  | FWEDFDL      | DLGLQLA                  |
| Lagomorpha | Oryctolagus cuniculus (European rabbit)                                      | HFFAFLECLWQVHAIGGCF | WEEFTD       | DLGLQLS                  |
| Scandentia | Tupaia minor (pygmy tree shrew)                                              | HCFAFLEFLFQVRAVRGC  | FWEDFDL      | DLGLQLA                  |
| Carnivora  | Canis lupus familiaris (dog)                                                 | HFFAFLEFLTQVQVVRGC  | FWENFKD      | DLGLQYA                  |
| Rodents    | Muridae Rattus norvegicus (brown rat)                                        | HFFAFLDFLVQVRVIQDC  | SWKEITD      | DLGLQLA                  |
|            | Muridae Mus musculus (house mouse)                                           | HFFAFLDFLVQVRVIQDC  | SWKEITD      | DLGLQLA                  |
|            | Cricetidae Cricetulus griseus (Chinese hamster)                              | HFFAFLDFLVQVKAIQHCS | WKEFTD       | DLGLQLA                  |
|            | Cricetidae Mesocricetus auratus (golden hamster)                             | HFFAFLDFLVQVKAIQDC  | SWKEFTD      | DLGLQLA                  |
|            | Cricetidae Peromyscus maniculatus bairdii (deer mouse)                       | HFFAFLDFLVQVKAIQSC  | AWKEFTD      | DLGLQLA                  |
|            | Cricetidae Microtus ochrogaster (prairie vole)                               | HFFAFLDFLVQVKVVQDC  | SWKEFTD      | DLGLQLA                  |
|            | Cricetidae Neotoma lepida (desert woodrat)                                   | HFFAFLDFLVQVKVIQDC  | SWKEFTD      | DLGLQLA                  |
|            | Dipodidae Jaculus jaculus (lesser Egyptian jerboa)                           | HFFAFLDFLVQVRAIQDC  | FWKEVTD      | DLGLQLA                  |
|            | Spalacidae Nannospalax galili (Northern Israeli blind subterranean mole rat) | HFFAFLDFLVQVRAIQSC  | FWKEITD      | DLGLQLA                  |
|            | Bathyergidae Heterocephalus glaber (naked mole rat)                          | HFFAFLEFLFHVQAVQGC  | FWEEVTD      | DLGLQLA                  |
|            | Bathyergidae Fukomys damarensis (Damara mole rat)                            | HFFAFLEFLFHVQAIQGC  | CCWEEITD     | DLGLQLA                  |

## 2. Supplementary Figures

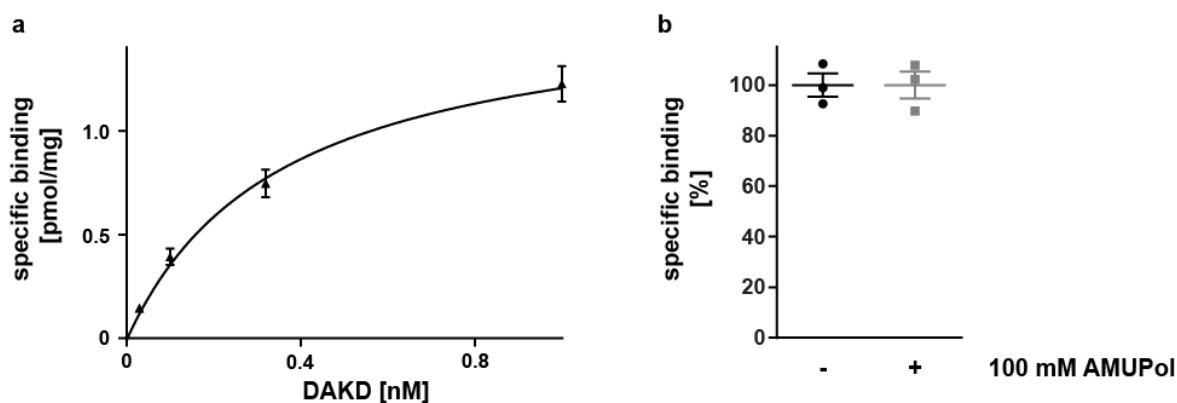

**Supplementary Figure 1: DAKD binds with high affinity to detergent-solubilized B<sub>1</sub>R (a) and total DAKD binding is not affected by the presence of the bi-nitroxide radical AMUPol (b).** (a) Binding of DAKD to the B<sub>1</sub>R solubilized in a mixed micelle of DDM and CHS can be saturated and takes place with high affinity ( $0.35 \pm 0.08$  nM), indicating that the receptor remains functional after solubilization from the membrane. (b) Total binding of DAKD to B<sub>1</sub>R is not influenced by the presence of AMUPol confirming that radical addition does not disrupt the receptor-ligand complex before freezing the sample in the spectrometer. For both assays, B<sub>1</sub>R was solubilized for 3 h in 1% DDM, 0.1% CHS in 50 mM HEPES-NaOH pH 7.6, 150 mM NaCl, 5% glycerol. Non-solubilized material was pelleted by ultracentrifugation. The receptor was immobilized on StrepTactin (StrepTactin SuperFlow Plus, Qiagen) beads and incubated with increasing concentrations of radiolabeled DAKD (Perkin Elmer) to determine the dissociation constant or with 10 nM radiolabeled DAKD in the presence of 100 mM AMUPol to assess the influence of the radical on total binding. Non-specific binding was assessed in the presence of 10  $\mu$ M unlabeled DAKD. Bound from unbound ligand was separated by transferring StrepTactin-immobilized receptors onto GF/B filters and washing with 50 mM HEPES-NaOH pH 7.6, 150 mM NaCl, 5% glycerol, 0.05% DDM, 0.005% CHS. Remaining radioactivity was measured by liquid scintillation counting. The binding assays were carried out in triplicate (n=3).

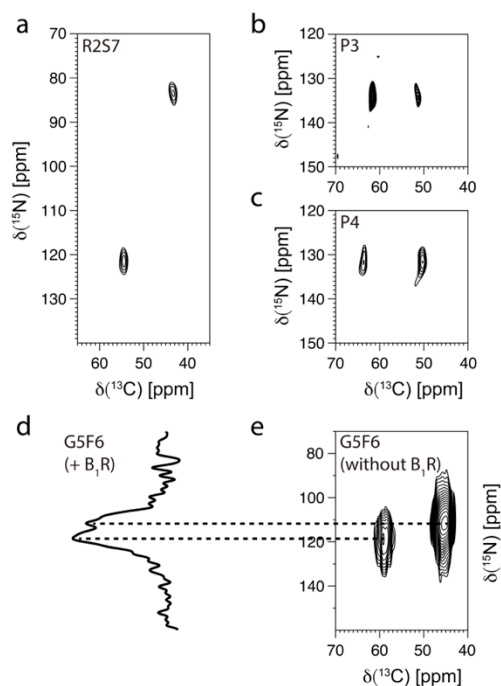

**Supplementary Figure 2: Subsections of  $^{15}\text{N}$ - $^{13}\text{C}$  TEDOR spectra of differently labeled DAKD bound to  $\text{B}_1\text{R}$ .** (a)  $\text{U-}[^{13}\text{C}, ^{15}\text{N}]\text{-R}_2\text{S}_7$  DAKD, (b)  $\text{U-}[^{13}\text{C}, ^{15}\text{N}]\text{-P}_3$  DAKD, (c)  $\text{U-}[^{13}\text{C}, ^{15}\text{N}]\text{-P}_4$  DAKD. Further subsections of  $\text{U-}[^{13}\text{C}, ^{15}\text{N}]\text{-R}_2\text{S}_7$  DAKD are shown in Supplementary Figure 7. Panel (d) presents CAN 1D  $^{15}\text{N}$  spectra of  $\text{U-}[^{13}\text{C}, ^{15}\text{N}]\text{-G}_5\text{F}_6$  DAKD bound to  $\text{B}_1\text{R}$ . Panel (e) shows NCA spectra of this peptide without receptor. The  $^{15}\text{N}$  chemical shifts of G5 and F6 can be easily assigned based on their characteristic values and high similarity to the values as indicated by the dashed horizontal lines.

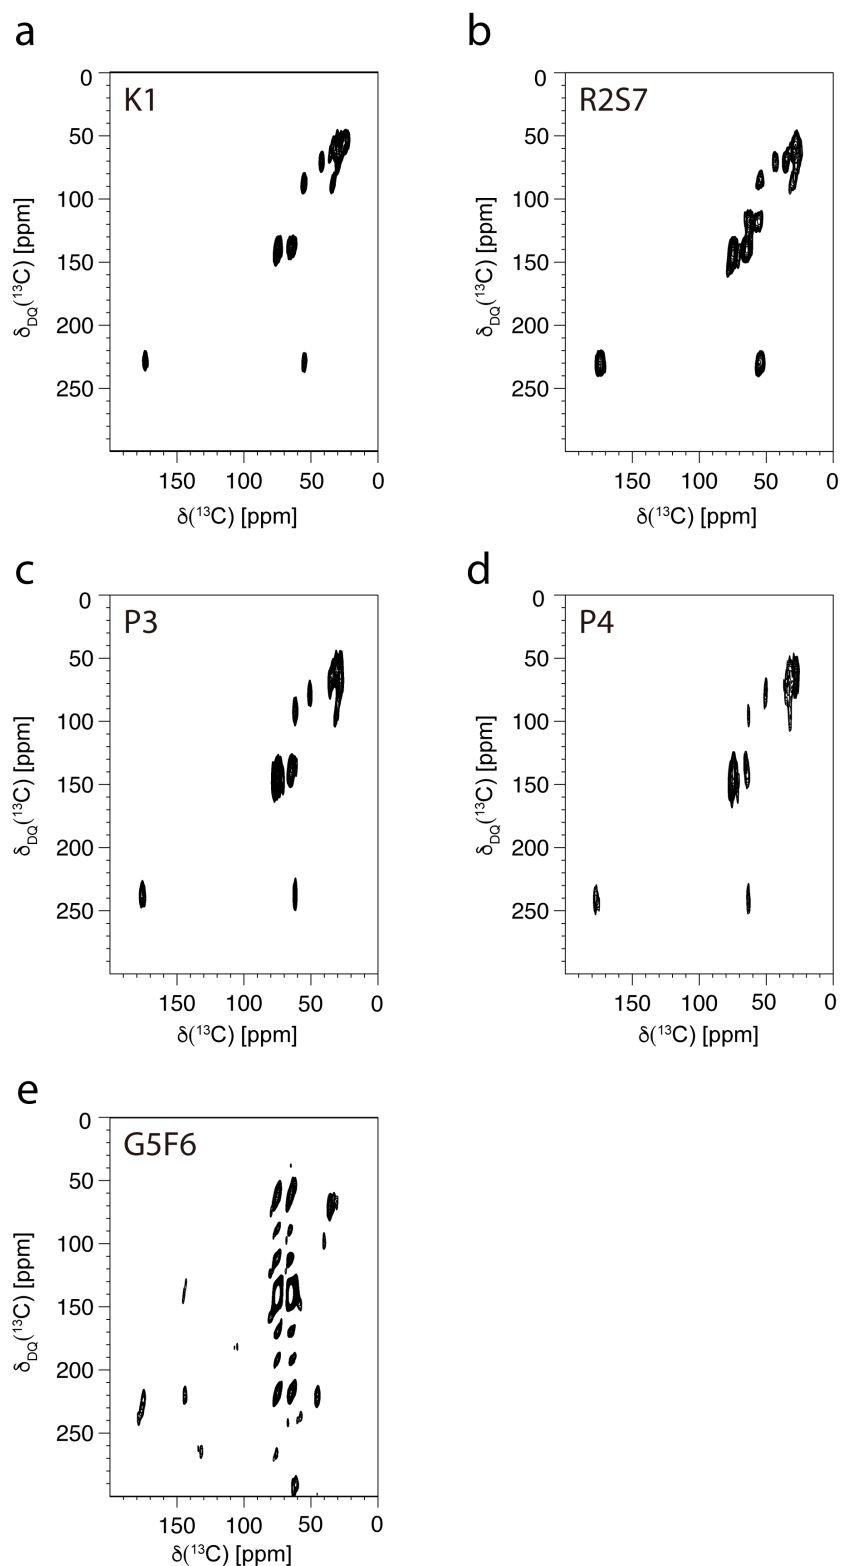

**Supplementary Figure 3: DQ-SQ  $^{13}\text{C}$ - $^{13}\text{C}$  2D spectra of DAKD bound to  $\text{B}_1\text{R}$ .** (a) U- $^{13}\text{C}$ ,  $^{15}\text{N}$ -K<sub>1</sub> DAKD, (b) U- $^{13}\text{C}$ ,  $^{15}\text{N}$ -R<sub>2</sub>S<sub>7</sub> DAKD, (c) U- $^{13}\text{C}$ ,  $^{15}\text{N}$ -P<sub>3</sub> DAKD, (d) U- $^{13}\text{C}$ ,  $^{15}\text{N}$ -P<sub>4</sub> DAKD, (e) U- $^{13}\text{C}$ ,  $^{15}\text{N}$ -G<sub>5</sub>F<sub>6</sub> DAKD. The “ridge” in spectrum (e) is caused by the natural abundance  $^{13}\text{C}$ - $^{13}\text{C}$  pair in glycerol, which was significantly reduced by the use of  $^{13}\text{C}$ -depleted glycerol in later measurements on other samples.

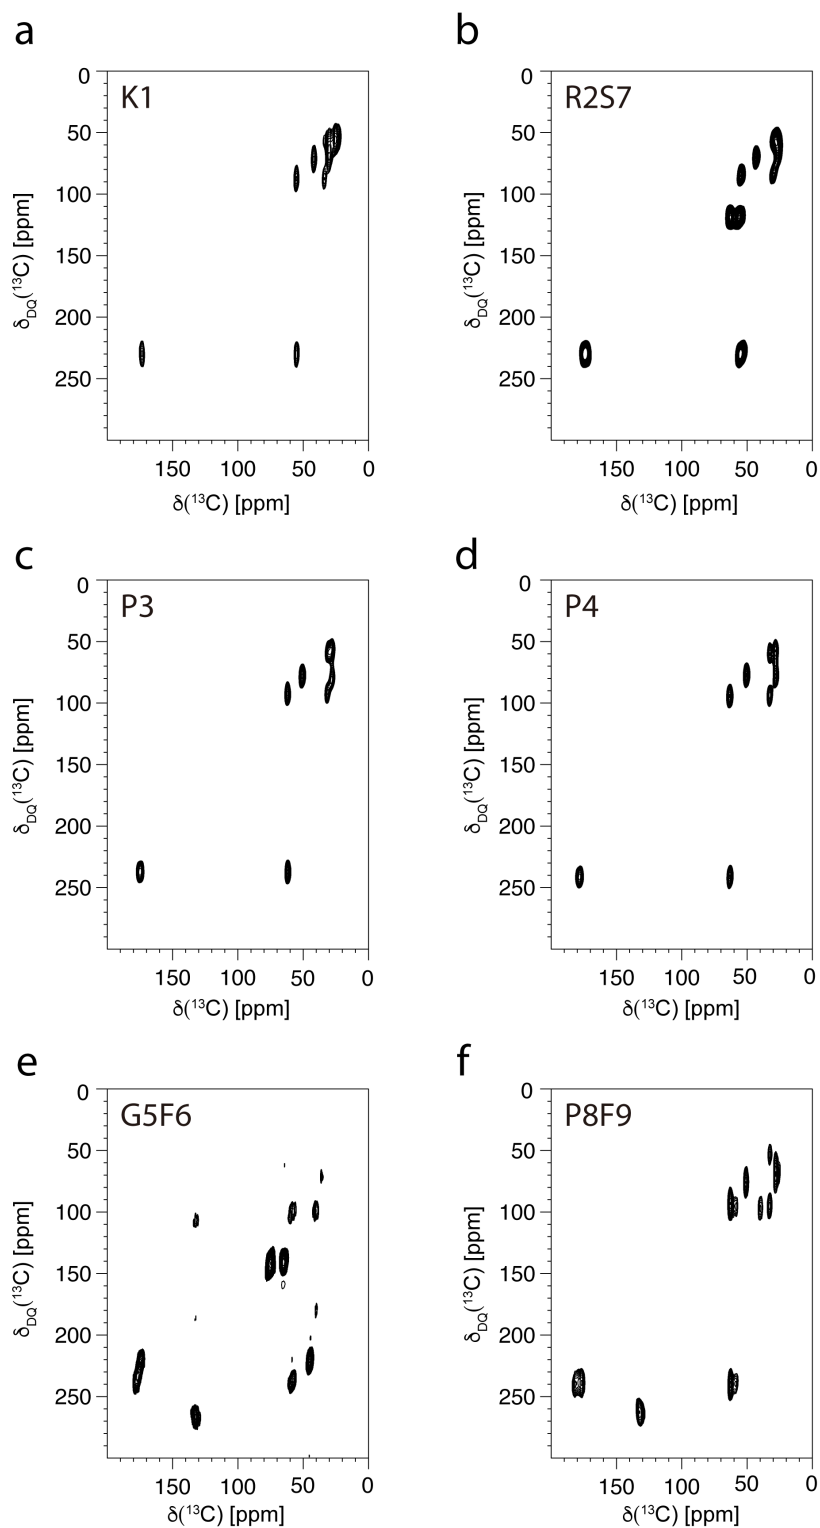

**Supplementary Figure 4: DQ-SQ  $^{13}\text{C}$ - $^{13}\text{C}$  2D spectra of DAHD without B<sub>1</sub>R.** (a) U- $^{13}\text{C}$ ,  $^{15}\text{N}$ ]-K<sub>1</sub> DAHD, (b) U- $^{13}\text{C}$ ,  $^{15}\text{N}$ ]-R<sub>2</sub>S<sub>7</sub> DAHD, (c) U- $^{13}\text{C}$ ,  $^{15}\text{N}$ ]-P<sub>3</sub> DAHD, (d) U- $^{13}\text{C}$ ,  $^{15}\text{N}$ ]-P<sub>4</sub> DAHD, (e) U- $^{13}\text{C}$ ,  $^{15}\text{N}$ ]-G<sub>5</sub>F<sub>6</sub> DAHD, (f) U- $^{13}\text{C}$ ,  $^{15}\text{N}$ ]-P<sub>8</sub>F<sub>9</sub> DAHD.

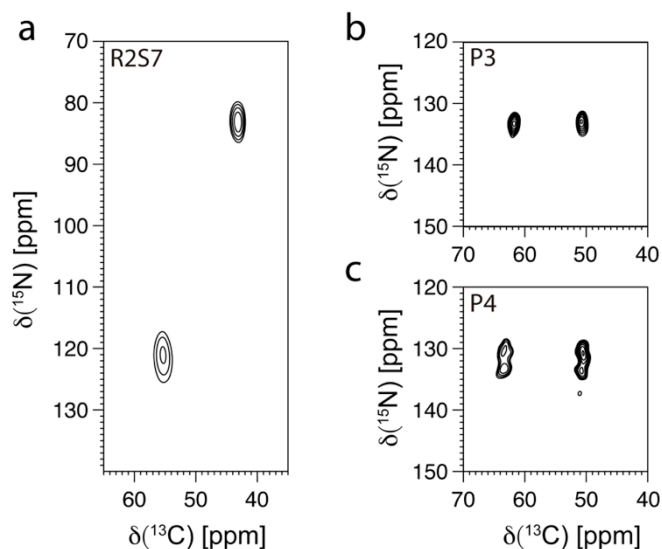

**Supplementary Figure 5:**  $^{15}\text{N}$ - $^{13}\text{C}$  2D TEDOR spectra of DAKD peptide without receptor. The peptides were labeled using different labeling schemes (Supplementary Table 1). (a) U- $^{13}\text{C}$ ,  $^{15}\text{N}$ -R<sub>2</sub>S<sub>7</sub> DAKD, (b) U- $^{13}\text{C}$ ,  $^{15}\text{N}$ -P<sub>3</sub> DAKD, (d) U- $^{13}\text{C}$ ,  $^{15}\text{N}$ -P<sub>4</sub> DAKD.

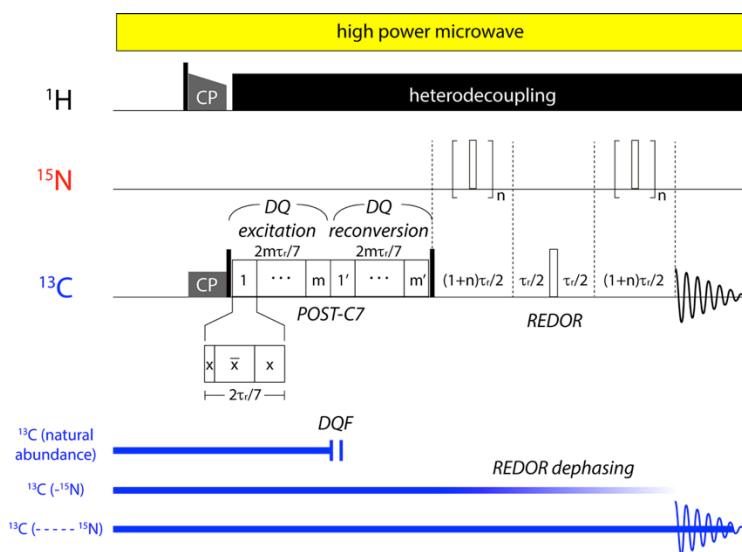

**Supplementary Figure 6:** DQ and REDOR doubly-filtered  $^{13}\text{C}$  1D pulse sequence used for acquiring the spectrum in Fig. 2f. The double-quantum-filter (DQF) removes efficiently natural abundance  $^{13}\text{C}$  signals. Subsequently,  $^{13}\text{C}$  magnetization of spins experiencing large  $^{13}\text{C}$ - $^{15}\text{N}$  dipolar couplings (e.g. from  $^{13}\text{C}$ - $^{15}\text{N}$  single bond distances) get dephased during a rotational-echo double-resonance spectroscopy (REDOR) recoupling period. The remaining signals mainly come from the  $^{13}\text{C}$  labeled sites, which are further away from  $^{15}\text{N}$  spins (i.e. those which are not directly bonded).

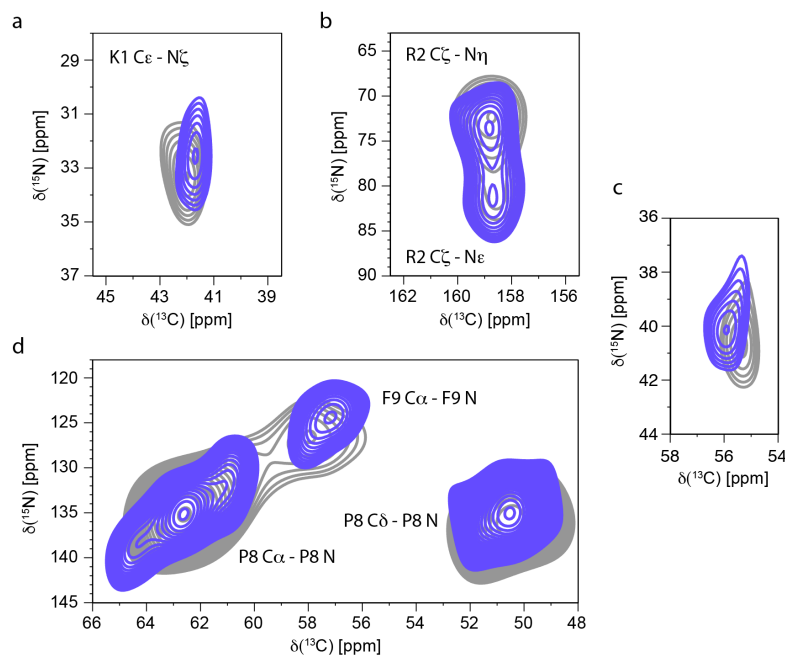

**Supplementary Figure 7: Comparison of  $^{15}\text{N}$ - $^{13}\text{C}$  TEDOR 2D spectra of DAKD free (grey) and bound (blue) to  $\text{B}_1\text{R}$ .** N- and C-terminal chemical shift changes: Lys and Arg side chain regions of  $^{15}\text{N}$ - $^{13}\text{C}$  TEDOR spectra of U- $^{13}\text{C}$ ,  $^{15}\text{N}$ -K<sub>1</sub> DAKD (a) and U- $^{13}\text{C}$ ,  $^{15}\text{N}$ -R<sub>2</sub>S<sub>7</sub> DAKD (b). Chemical shift perturbations of the C $\epsilon$ -N $\zeta$  cross-peak of K1<sup>DAKD</sup> and the C $\zeta$ -N $\epsilon$  cross-peak of R2<sup>DAKD</sup> indicate the involvement of these side chains in binding. (c) Comparison of  $^{15}\text{N}$ - $^{13}\text{C}$  TEDOR 2D spectra of U- $^{13}\text{C}$ ,  $^{15}\text{N}$ -K<sub>1</sub> DAKD free and bound to  $\text{B}_1\text{R}$ . Small chemical shift changes on both the  $^{13}\text{C}$  and  $^{15}\text{N}$  dimensions are observed for amine  $^{15}\text{N}$  /  $^{13}\text{C}\alpha$  cross peak of K1<sup>DAKD</sup> upon binding to  $\text{B}_1\text{R}$ . (d) The  $^{15}\text{N}$ - $^{13}\text{C}$  TEDOR spectrum of U- $^{13}\text{C}$ ,  $^{15}\text{N}$ -P<sub>8</sub>F<sub>9</sub> DAKD reveals a chemical shift change for the C $\alpha$ -N cross-peak of F9<sup>DAKD</sup> indicating a backbone conformational change upon binding.

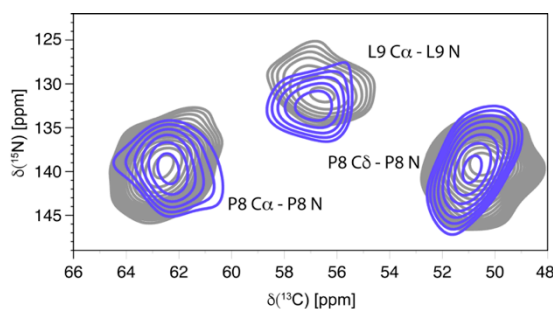

**Supplementary Figure 8:  $^{15}\text{N}$ - $^{13}\text{C}$  TEDOR 2D spectra show significant backbone chemical shift changes of antagonist peptide U- $^{13}\text{C}$ ,  $^{15}\text{N}$ -P<sub>8</sub>L<sub>9</sub> DALK upon binding to human  $\text{B}_1\text{R}$ .** The spectrum of DALK bound to  $\text{B}_1\text{R}$  is shown in blue and the spectrum of DALK without receptor is shown in grey.



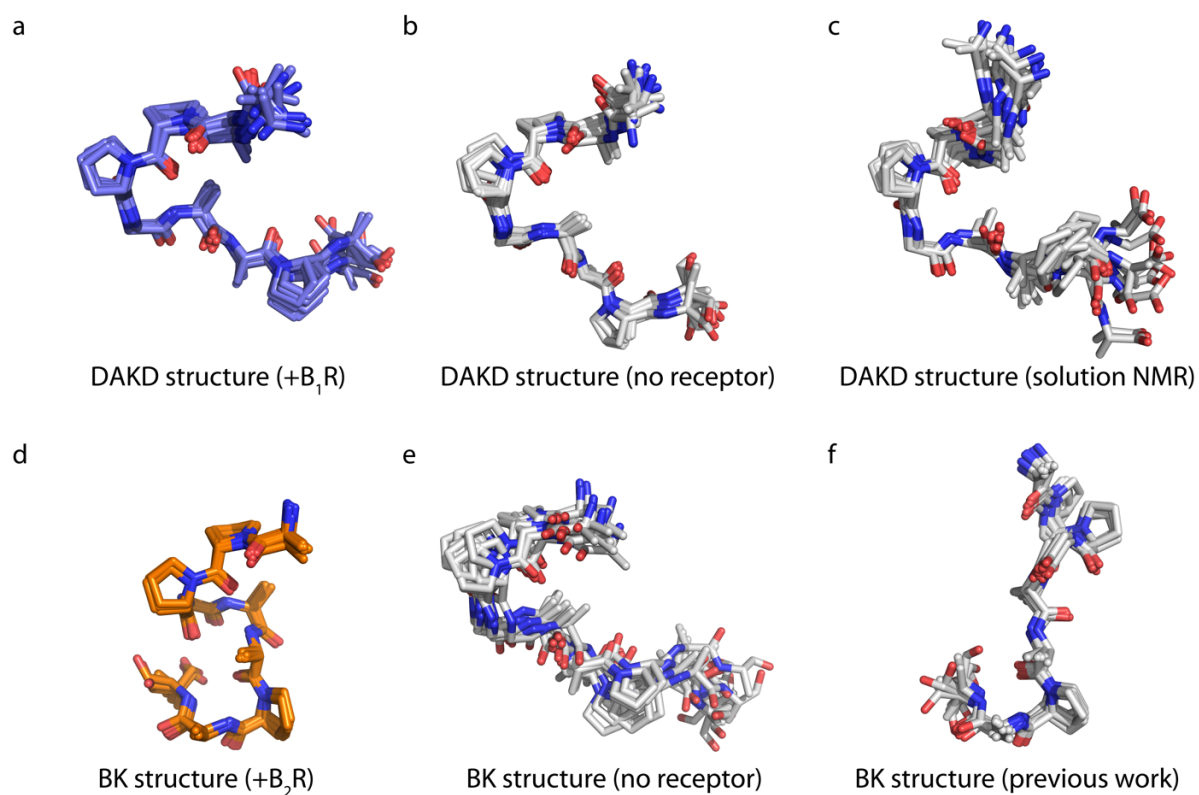

**Supplementary Figure 9: Comparison of DAKD and BK NMR structures.** DAKD bound to B<sub>1</sub>R (a) and in frozen solution as determined from chemical shift by DNP-enhanced MAS-NMR (b). DAKD in solution determined by liquid-state NMR from chemical shifts and distance restraints (c). BK bound to B<sub>2</sub>R re-calculated from TALOS+ from previously published chemical shifts<sup>26</sup> (d) and without receptor in frozen solution (e). Previously published structure of receptor-bound BK (f). Only backbone and C $\beta$  atoms are shown. Each bundle contains 10 structures/models. The C-terminal residues of DAKD experience a subtle structural rearrangement upon binding to B<sub>1</sub>R. In contrast, the C-terminal part of BK shows large conformational changes between receptor-bound and free states. The structure refinement statistics is summarized in Supplementary Tables 6-8.

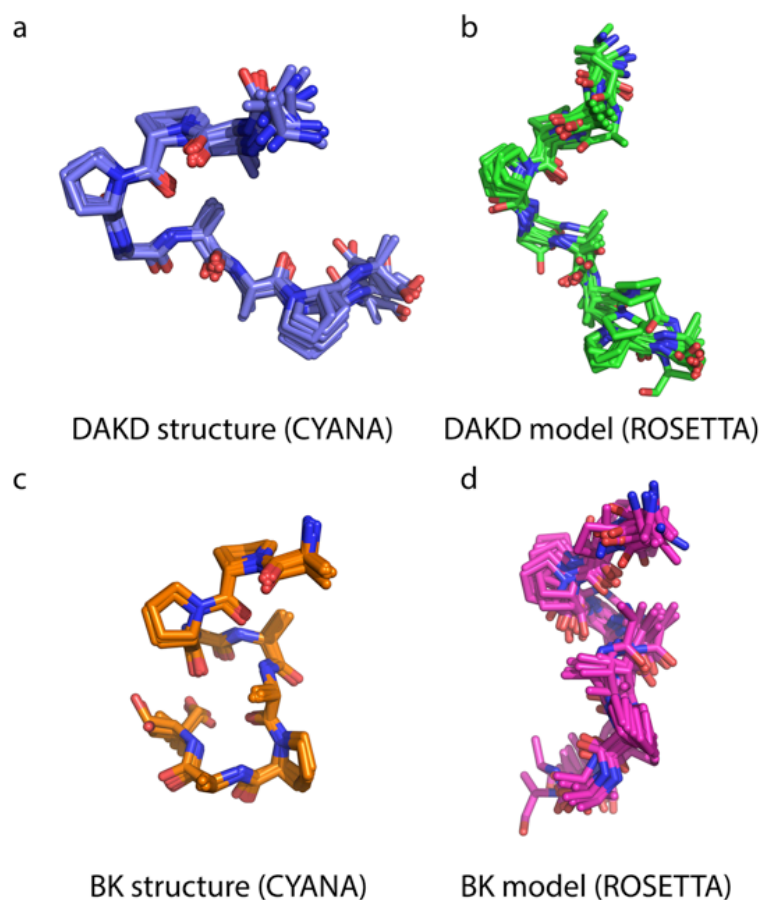

**Supplementary Figure 10: Comparison of NMR structures (a,c) and Rosetta models (b,d) of DAKD (a,b) and BK (c,d) bound to human B<sub>1</sub>R and human B<sub>2</sub>R respectively.** Only backbone part and C $\beta$  atoms of are shown. Each bundle contains 10 structures/models. The characteristic V-shape folding of DAKD (a) and S-shape folding of BK (c) were reproduced by Rosetta modeling (b,d). The backbone heavy atom RMSD between the final set of 10 Rosetta models and the NMR structure of BK is 2.1 Å on average. In case of DAKD, the average backbone RMSD between the Rosetta created ensemble and the NMR structural model obtained from the forward-predicted cluster A is 2.2 Å. The RMSD between the Rosetta created ensemble and the structure obtained by back-calculating from TALOS+ torsion angle restraints is 2.3 Å. Thus, the Rosetta models clearly confirm the overall structural motifs of both peptide ligands as inferred from the NMR chemical shift data. Some small torsion angle differences were observed between NMR and Rosetta models, which can be attributed to the receptor background in which the Rosetta modeling was performed. For DAKD, torsion angle differences for the first two N-terminal residues were observed, which could arise from some structural variability of ECL3 and thus different ligand interaction modes in our B<sub>1</sub>R models. In case of BK, different values for the  $\phi$  angle of F8<sup>BK</sup> and  $\psi$  angle of P7<sup>BK</sup> were obtained, reflecting a slightly more extended conformation of the C-terminal tail. Our B<sub>2</sub>R binding model shows interactions of BK with TMH3 at the lower end of the binding pocket, which requires the C-terminus to stretch, leading to the described structural differences.

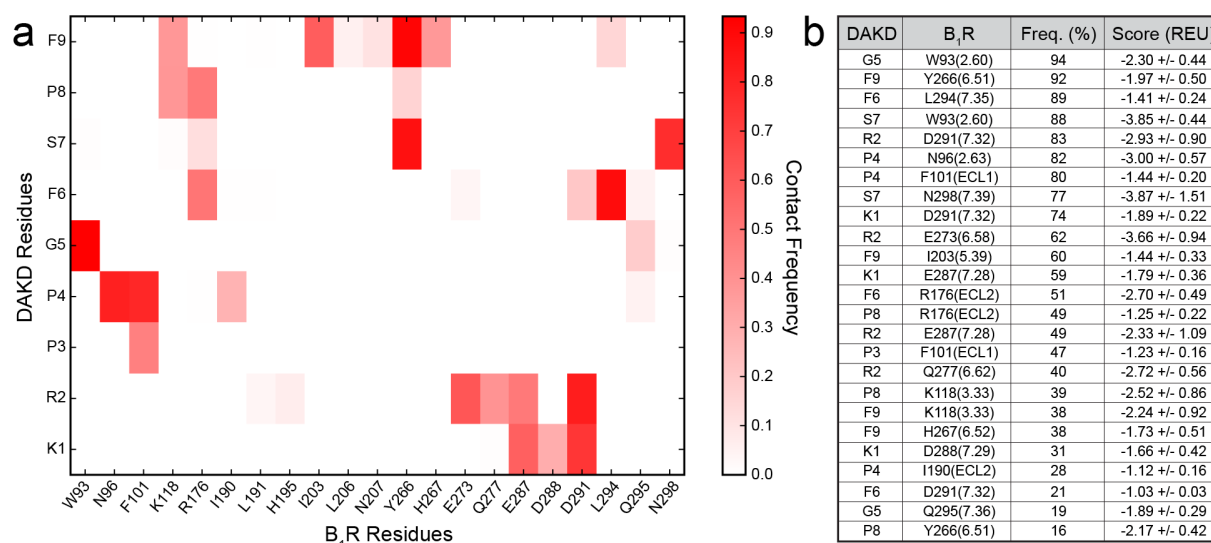

**Supplementary Figure 11: Analysis of the B<sub>1</sub>R-DAKD receptor-peptide interface.** (a) Heatmap displaying the frequency of DAKD-B<sub>1</sub>R contacts with a Rosetta score better than -1.0 REU as observed across the 1000 top docking models. (b) Summary of the 25 most frequent residue pairs in DAKD-B<sub>1</sub>R models.

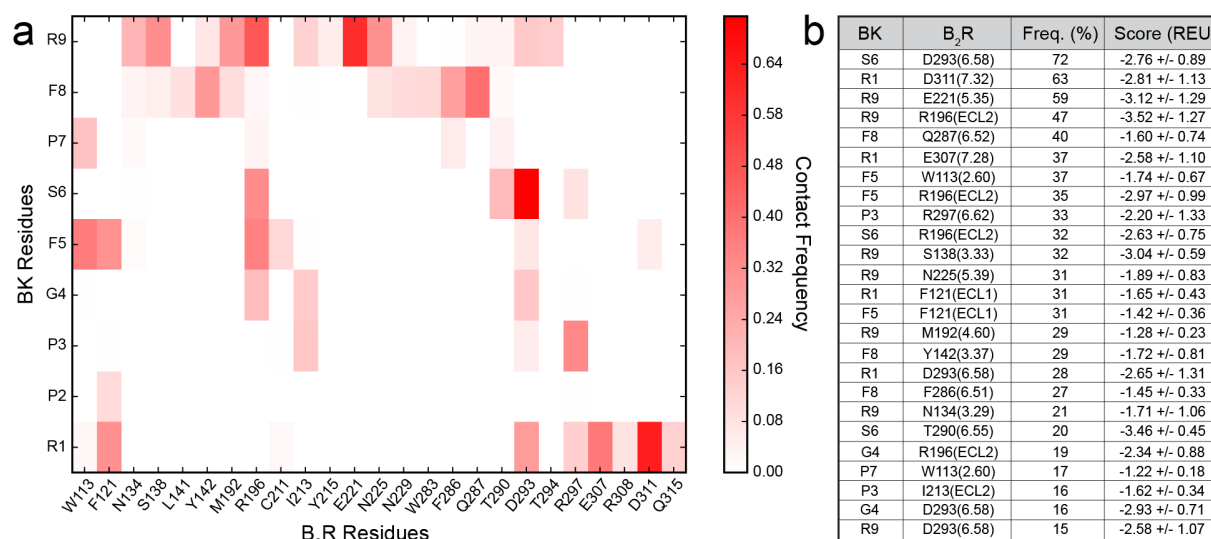

**Supplementary Figure 12: Analysis of the B<sub>2</sub>R-BK receptor-peptide interface.** (a) Heatmap displaying the frequency of BK-B<sub>2</sub>R contacts with a Rosetta score better than -1.0 REU as observed across the 1000 top docking models. (b) Summary of the 25 most frequent residue pairs in BK-B<sub>2</sub>R models. The N-terminal residue R1<sup>BK</sup> is close to D293<sup>6.58</sup>, E307<sup>7.28</sup> and D311<sup>7.32</sup> (Figures 5b,d). Its positively charged amine-terminus and side chain make multiple interactions with these residues. We found the R1<sup>BK</sup> side chain not in a single position but instead to sample several orientations and make electrostatic interactions with D293<sup>6.58</sup> and D311<sup>7.32</sup> as well as H-bond contacts with Q315<sup>7.36</sup>. At its C-terminal end, BK is fixed by an H-bond between the R9<sup>BK</sup> carboxyl group and residue S138<sup>3.33</sup>, which is structurally similar to the DAKD-B<sub>1</sub>R complex where F9<sup>DAKD</sup> interacts with K118<sup>3.33</sup> (Figures 5b,f). The side chain of R9<sup>BK</sup> was found to participate in frequent interactions with E221<sup>5.35</sup> and N225<sup>5.39</sup> at the extracellular end of TMH V (Figure 5f). The BK C-terminus is further stabilized by B<sub>2</sub>R residue F286<sup>6.51</sup>, which has a strong effect on ligand binding<sup>27</sup>. We observed this residue to pack against P7<sup>BK</sup> and F8<sup>BK</sup> and, together with L141<sup>3.36</sup>, Y142<sup>3.37</sup> and T290<sup>6.56</sup>, form a hydrophobic environment for F8<sup>BK</sup> (Figure 5f). A contribution of Y142<sup>3.37</sup> and T290<sup>6.56</sup> to ligand binding can be inferred from the available mutational data, too. Furthermore, our B<sub>2</sub>R binding model predicts several interactions that have not been described before, such as hydrophobic contacts between F5<sup>BK</sup> and the aromatic side chains of W113<sup>2.60</sup> and F121 in ECL1 as well as several H-bonds between the central portion of the BK backbone and R196 in ECL2. Interestingly, we have identified and experimentally validated the corresponding residues in B<sub>1</sub>R (W93<sup>2.60</sup>, F101 and R176) as important DAKD interactions sites, which suggests that this group of conserved receptor residues is important for binding the middle region of both peptide ligands. For example, R176 in B<sub>1</sub>R and R196 in B<sub>2</sub>R, play a similar role as H-bond donor. However, due to its more extended, open conformation DAKD forms a dense H-bond network with R176 and additional receptor residues, which is not observed to this high extent for BK.

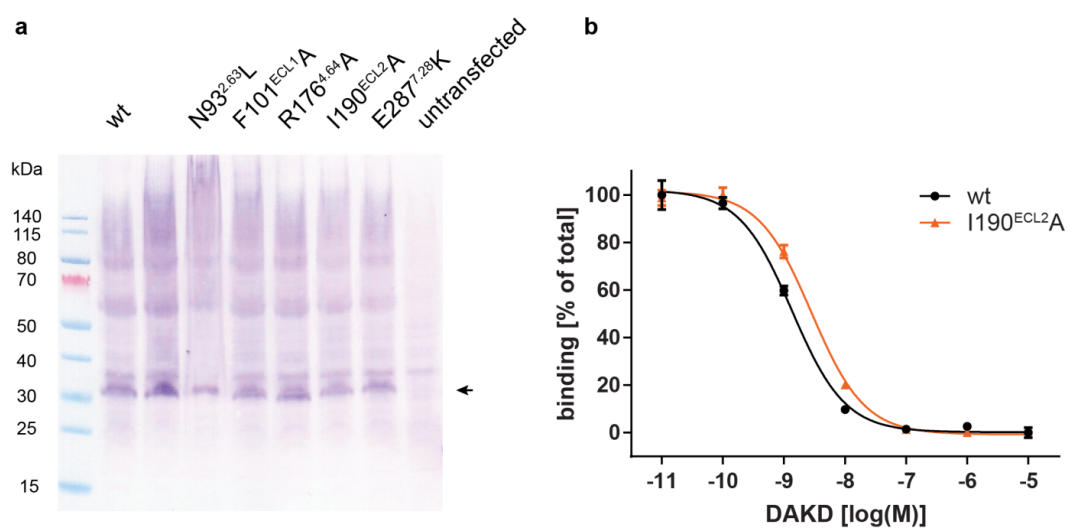

**Supplementary Figure 13: Expression of B<sub>1</sub>R mutants (a) and competition binding experiments of wild type and I190<sup>ECL2</sup>A B<sub>1</sub>R (b).** The expression level of B<sub>1</sub>R mutants was assessed by Western blot using an M2 FLAG antibody against the N-terminal FLAG tag. All mutants express comparably to wild type (wt). The lane between wt and N93<sup>2,63</sup>L contains an unrelated sample. (b) Competition binding analysis of wild type and I190<sup>ECL2</sup>A B<sub>1</sub>R expressed in HEK cells. Replacing I190<sup>ECL2</sup> with an alanine residue results in a slight decrease of the IC<sub>50</sub> of DAKD (I190<sup>ECL2</sup>A 2.8 ± 0.2 nM, wild type (wt) 1.4 ± 0.7 nM; n=2). See Figure 4b for comparative binding experiments.



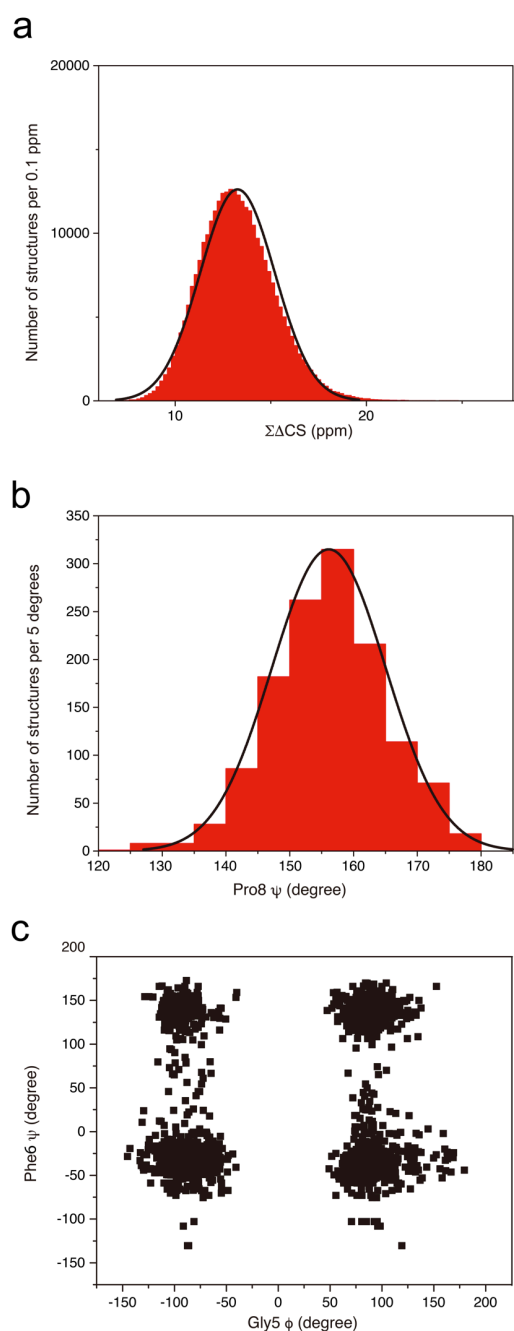

**Supplementary Figure 15: Characteristics of Flexible-Meccano/SHIFTX-based forward chemical shift fitting approach on B<sub>1</sub>R-bound DAKD.** (a) Overall Gaussian-like distribution of conformations along  $\Sigma\Delta\text{CS}$  in Flexible-Meccano/SHIFTX approach. (b) An example showing the Gaussian-like torsion angle distribution in the top 1490 structures selected by the parameter *cutoff* (see online methods). (c) An example showing independent torsion angle ambiguity in torsion angle restraints obtained from top 1490 structures in the Flexible Meccano/SHIFTX-based forward fitting.

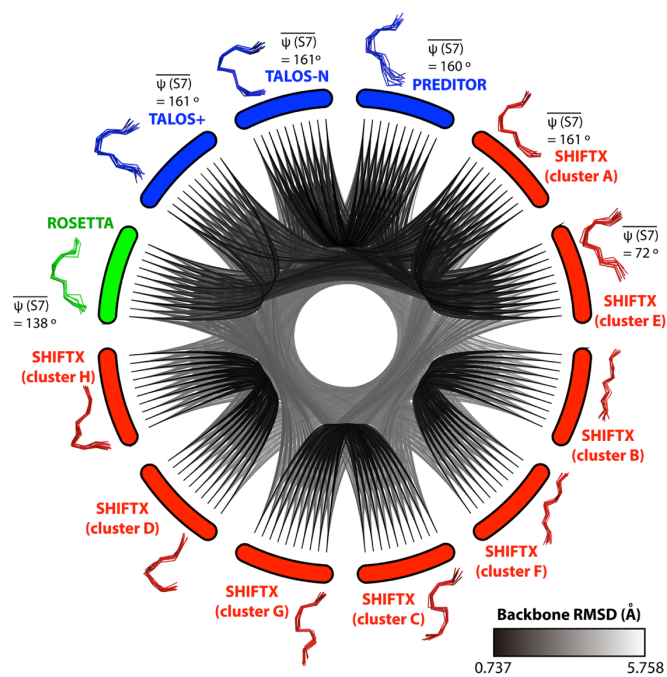

**Supplementary Figure 16: RMSD analysis of DAKD structures/models generated using different approaches.** The string plot is generated using CIRCOS-0.69.3<sup>28</sup>.

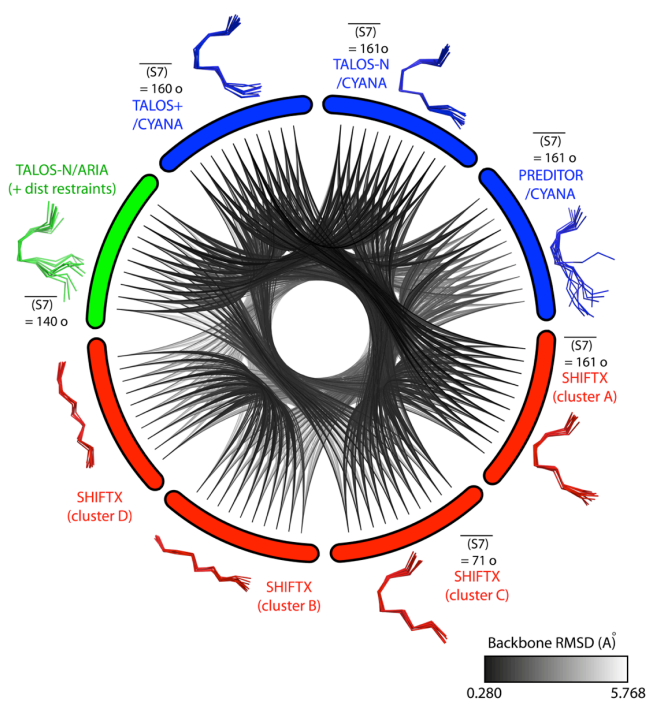

**Supplementary Figure 17: RMSD analysis of non-bound DAKD structures/models generated using different approaches.** The string plot is generated using CIRCOS-0.69.3<sup>28</sup>.



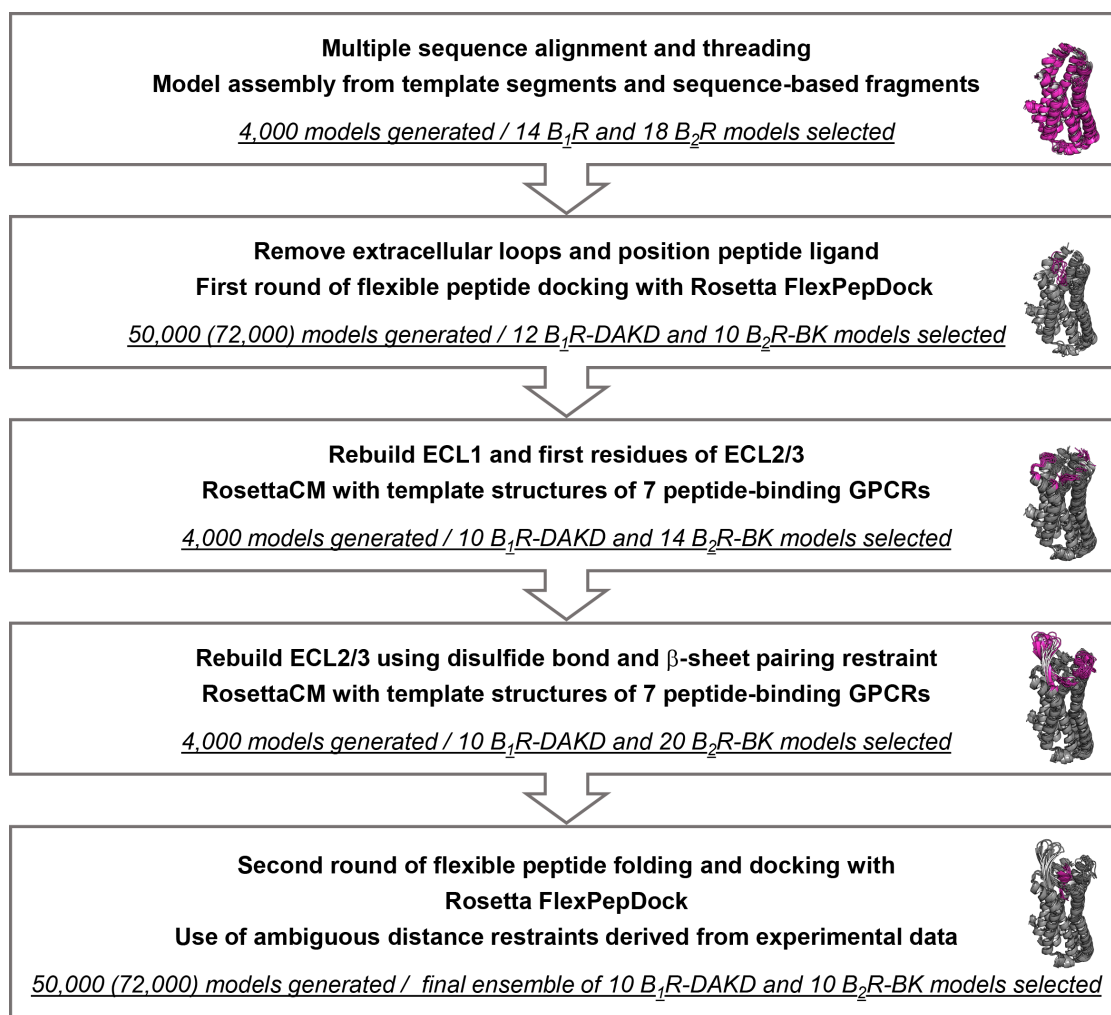

**Supplementary Figure 18: Workflow of B<sub>1</sub>R-DAKD and B<sub>2</sub>R-bradykinin modeling and docking.**

Ensembles of B<sub>1</sub>R and B<sub>2</sub>R models in complex with their endogenous ligands DAKD and bradykinin were constructed by several rounds of comparative modeling, loop building and ligand docking. Comparative modeling of the transmembrane helix region was performed using 24 GPCR template structures, whereas for loop modeling only seven peptide-binding GPCRs with higher sequence similarity to B<sub>1</sub>R and B<sub>2</sub>R were used as templates. Peptide docking was guided by loose distance restraints derived from mutational data previously reported for B<sub>1</sub>R and B<sub>2</sub>R. Representative models for each modeling stage are depicted in the flowchart. For selecting the final cluster, a chemical shift filtering step was applied (see online methods).

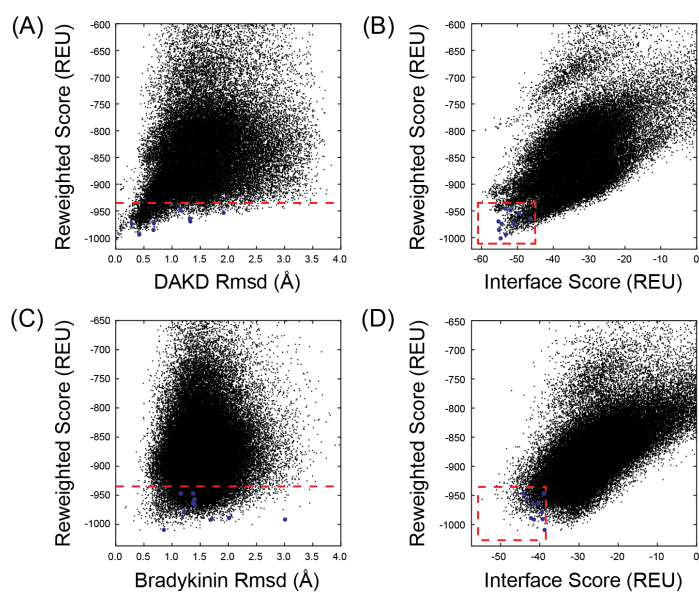

**Supplementary Figure 19: Rosetta reweighted score vs. peptide backbone RMSD and interface score plots for docking of DAKD to B<sub>1</sub>R (A and B) and bradykinin to B<sub>2</sub>R (C and D).** The ten largest clusters (shown as blue circles) were created from the best 1,000 models by reweighted and interface score (area within the red rectangle). The reweighted score combine the Rosetta total, peptide and interface energy.

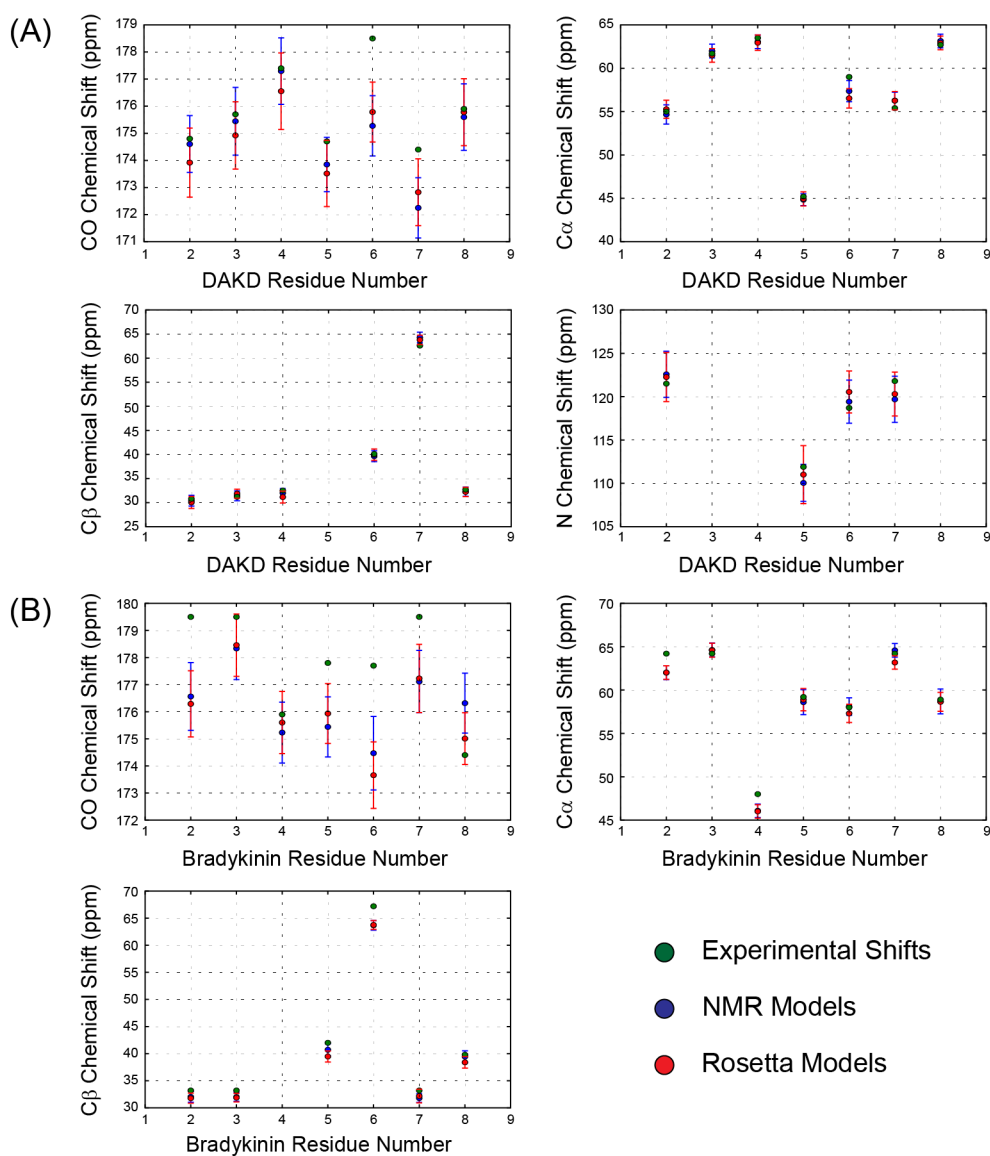

**Supplementary Figure 20: Comparison of experimental and SPARTA+ back-calculated chemical shifts for NMR and Rosetta structural models of (A) DAKD and (B) bradykinin.** Calculated chemical shifts represent the average of the final NMR structural models, as obtained by the forward prediction method (DAKD, cluster A) or by the TALOS+ method (BK) and the 10 final Rosetta models. Error bars depict the prediction uncertainty of SPARTA+. Chemical shift values of the first and last residue were not calculated because the prediction requires torsion angle information from two direct neighbor residues. The SPARTA+ calculated chemical shifts for the presented Rosetta ensemble of DAKD and BK gave an average RMSD of  $1.33 \pm 0.07$  ppm and  $1.99 \pm 0.10$  ppm, respectively, which compares to  $1.34 \pm 0.14$  ppm and  $1.82 \pm 0.06$  ppm for the respective NMR models. Using SHIFTX2, a comparable good agreement was obtained and RMSD values were  $1.56 \pm 0.10$  ppm and  $1.98 \pm 0.06$  ppm for Rosetta models and  $1.65 \pm 0.15$  ppm and  $1.89 \pm 0.06$  ppm for NMR models of DAKD and BK, respectively.

#### 4. References

1. Zhang, H. et al. Structure of the Angiotensin receptor revealed by serial femtosecond crystallography. *Cell* **161**, 833-844 (2015).
2. Tan, Q. et al. Structure of the CCR5 chemokine receptor-HIV entry inhibitor maraviroc complex. *Science* **341**, 1387–1390 (2013).
3. Wu, H. et al. Structure of the human  $\kappa$ -opioid receptor in complex with JDTic. *Nature* **485**, 327–332 (2012).
4. Yin, J. et al. Structure and ligand-binding mechanism of the human OX1 and OX2 orexin receptors. *Nat. Struct. Mol. Biol.* **23**, 293-299 (2016).
5. Zhang, D. et al. Two disparate ligand-binding sites in the human P2Y1 receptor. *Nature* **520**, 317-321 (2015).
6. Fenalti, G. et al. Molecular control of  $\delta$ -opioid receptor signalling. *Nature* **506**, 191–196 (2014).
7. Manglik, A. et al. Crystal structure of the  $\mu$ -opioid receptor bound to a morphinan antagonist. *Nature* **485**, 321–326 (2012).
8. Chrencik, J.E. et al. Crystal Structure of Antagonist Bound Human Lysophosphatidic Acid Receptor 1. *Cell* **161**, 1633-1643 (2015).
9. Thompson, A.A. et al. Structure of the nociceptin/orphanin FQ receptor in complex with a peptide mimetic. *Nature* **485**, 395–399 (2012).
10. Standfuss, J. et al. The structural basis of agonist-induced activation in constitutively active rhodopsin. *Nature* **471**, 656–660 (2011).
11. Wacker, D. et al. Structural features for functional selectivity at serotonin receptors. *Science* **340**, 615–619 (2013).
12. Warne, T. et al. The structural basis for agonist and partial agonist action on a beta(1)-adrenergic receptor. *Nature* **469**, 241-244 (2011).
13. Zhang, C. et al. High-resolution crystal structure of human protease-activated receptor 1. *Nature* **492**, 387–392 (2012).
14. Haga, K. et al. Structure of the human M2 muscarinic acetylcholine receptor bound to an antagonist. *Nature* **482**, 547–551 (2012).
15. Shimamura, T. et al. Structure of the human histamine H1 receptor complex with doxepin. *Nature* **475**, 65–70 (2011).
16. Thorsen, T.S., Matt, R., Weis, W.I. & Kobilka, B.K. Modified T4 Lysozyme Fusion Proteins Facilitate G Protein-Coupled Receptor Crystallography. *Structure* **22**, 1657-1664 (2014).
17. Rasmussen, S.G.F. et al. Crystal structure of the  $\beta$ 2 adrenergic receptor-Gs protein complex. *Nature* **477**, 549–555 (2011).
18. Cherezov, V. et al. High-resolution crystal structure of an engineered human beta2-adrenergic G protein-coupled receptor. *Science* **318**, 1258-1265 (2007).
19. Xu, F. et al. Structure of an agonist-bound human A2A adenosine receptor. *Science* **332**, 322–327 (2011).
20. Jaakola, V.P. et al. The 2.6 angstrom crystal structure of a human A2A adenosine receptor bound to an antagonist. *Science* **322**, 1211-1217 (2008).
21. Hanson, M.A. et al. Crystal structure of a lipid G protein-coupled receptor. *Science* **335**, 851–855 (2012).
22. Chien, E.Y.T. et al. Structure of the human dopamine D3 receptor in complex with a D2/D3 selective antagonist. *Science* **330**, 1091–1095 (2010).
23. Wang, C. et al. Structural basis for molecular recognition at serotonin receptors. *Science* **340**, 610–614 (2013).
24. Srivastava, A. et al. High-resolution structure of the human GPR40 receptor bound to allosteric agonist TAK-875. *Nature* **513**, 124–127 (2014).
25. Corpet, F. Multiple sequence alignment with hierarchical-clustering. *Nucleic Acids Res.* **16**, 10881-10890 (1988).
26. Lopez, J.J. et al. The structure of the neuropeptide bradykinin bound to the human G-protein coupled receptor bradykinin B2 as determined by solid-state NMR spectroscopy. *Angew. Chem. Int. Ed.* **47**, 1668-1671 (2008).
27. Jarnagin, K. et al. Mutations in the B2 bradykinin receptor reveal a different pattern of contacts for peptidic agonists and peptidic antagonists. *J. Biol. Chem.* **271**, 28277–28286 (1996).
28. Krzywinski, M. et al. Circos: An information aesthetic for comparative genomics. *Genome Res.* **19**, 1639-1645 (2009).
